# Supplementary material
Source: PubMed Central journal article supplement (PMC7960290)
Supplement: 15-01117.pdf [file 15-01117.pdf]

**On-line Table: Frequency of lesion patterns on susceptibility MRI<sup>a</sup>**

| Lesion Pattern                 | MS Disease Subtype                              |           |                                          |                    |                                             |          | EDSS                                     |           | MFIS                                   |                    |                                         |  |                                         |  |
|--------------------------------|-------------------------------------------------|-----------|------------------------------------------|--------------------|---------------------------------------------|----------|------------------------------------------|-----------|----------------------------------------|--------------------|-----------------------------------------|--|-----------------------------------------|--|
|                                | All Lesions, n = 306<br>Lesions, 24<br>Subjects |           | RRMS, n = 263<br>Lesions, 21<br>Subjects |                    | SPMS/PPMS,<br>n = 43 Lesions,<br>3 Subjects |          | <5.0, n = 214<br>Lesions, 18<br>Subjects |           | ≥5.0, n = 92<br>Lesions, 6<br>Subjects |                    | <40, n = 167<br>Lesions, 11<br>Subjects |  | ≥40, n = 139<br>Lesions, 13<br>Subjects |  |
|                                |                                                 |           |                                          |                    |                                             |          |                                          |           |                                        |                    |                                         |  |                                         |  |
| R2*                            |                                                 |           |                                          |                    |                                             |          |                                          |           |                                        |                    |                                         |  |                                         |  |
| Hypointense, no rim            | 268 (88%)                                       | 228 (87%) | 40 (93%)                                 | .243               | 181 (85%)                                   | 87 (95%) | .015 <sup>b</sup>                        | 153 (92%) | 115 (83%)                              | .019               |                                         |  |                                         |  |
| Hypointense, hyperintense rim  | 16 (5%)                                         | 13 (5%)   | 3 (7%)                                   | .579               | 11 (5%)                                     | 5 (5%)   | .915                                     | 9 (5%)    | 7 (5%)                                 | .890               |                                         |  |                                         |  |
| Isointense, no rim             | 18 (6%)                                         | 18 (7%)   | 0 (0%)                                   | .077               | 18 (8%)                                     | 0 (0%)   | .004 <sup>b</sup>                        | 2 (1%)    | 16 (12%)                               | <.001 <sup>b</sup> |                                         |  |                                         |  |
| Phase                          |                                                 |           |                                          |                    |                                             |          |                                          |           |                                        |                    |                                         |  |                                         |  |
| Hypointense, no rim            | 26 (9%)                                         | 23 (9%)   | 3 (7%)                                   | .700               | 17 (8%)                                     | 9 (10%)  | .597                                     | 19 (11%)  | 7 (5%)                                 | .048 <sup>b</sup>  |                                         |  |                                         |  |
| Hypointense, hyperintense rim  | 10 (3%)                                         | 9 (3%)    | 1 (2%)                                   | .708               | 5 (2%)                                      | 5 (5%)   | .162                                     | 7 (4%)    | 3 (2%)                                 | .319               |                                         |  |                                         |  |
| Isointense, no rim             | 129 (42%)                                       | 110 (42%) | 19 (44%)                                 | .771               | 93 (43%)                                    | 36 (39%) | .482                                     | 76 (46%)  | 53 (38%)                               | .193               |                                         |  |                                         |  |
| Isointense, hyperintense rim   | 29 (10%)                                        | 19 (7%)   | 10 (23%)                                 | .001 <sup>b</sup>  | 15 (7%)                                     | 14 (15%) | .025                                     | 8 (5%)    | 21 (15%)                               | .002 <sup>b</sup>  |                                         |  |                                         |  |
| Isointense, hypointense rim    | 9 (3%)                                          | 9 (3%)    | 0 (0%)                                   | .218               | 8 (4%)                                      | 1 (1%)   | .208                                     | 4 (2%)    | 5 (4%)                                 | .536               |                                         |  |                                         |  |
| Hyperintense, no rim           | 90 (29%)                                        | 80 (30%)  | 10 (23%)                                 | .339               | 63 (29%)                                    | 27 (29%) | .987                                     | 50 (30%)  | 40 (29%)                               | .824               |                                         |  |                                         |  |
| Hyperintense, hypointense rim  | 9 (3%)                                          | 9 (3%)    | 0 (0%)                                   | .218               | 9 (4%)                                      | 0 (0%)   | .046 <sup>b</sup>                        | 3 (2%)    | 6 (4%)                                 | .194               |                                         |  |                                         |  |
| Any core, hypointense rim      | 9 (3%)                                          | 9 (3%)    | 0 (0%)                                   | .218               | 8 (4%)                                      | 1 (1%)   | .208                                     | 4 (2%)    | 5 (4%)                                 | .536               |                                         |  |                                         |  |
| Any core, hyperintense rim     | 39 (13%)                                        | 28 (11%)  | 11 (26%)                                 | .006 <sup>b</sup>  | 20 (9%)                                     | 19 (21%) | .007 <sup>b</sup>                        | 15 (9%)   | 24 (17%)                               | .030 <sup>b</sup>  |                                         |  |                                         |  |
| Phase with any rim             | 48 (16%)                                        | 37 (14%)  | 11 (26%)                                 | .078               | 28 (13%)                                    | 20 (22%) | .094                                     | 19 (11%)  | 29 (21%)                               | .012 <sup>b</sup>  |                                         |  |                                         |  |
| QSM                            |                                                 |           |                                          |                    |                                             |          |                                          |           |                                        |                    |                                         |  |                                         |  |
| Isointense, no rim             | 110 (36%)                                       | 94 (36%)  | 16 (37%)                                 | .852               | 82 (38%)                                    | 28 (30%) | .188                                     | 69 (41%)  | 41 (29%)                               | .032 <sup>b</sup>  |                                         |  |                                         |  |
| Isointense, hyperintense rim   | 17 (6%)                                         | 10 (4%)   | 7 (16%)                                  | .001 <sup>b</sup>  | 8 (4%)                                      | 9 (10%)  | .034 <sup>b</sup>                        | 5 (3%)    | 12 (9%)                                | .032               |                                         |  |                                         |  |
| Isointense, hypointense rim    | 2 (1%)                                          | 1 (0%)    | 1 (2%)                                   | .142               | 1 (0%)                                      | 1 (1%)   | .537                                     | 0 (0%)    | 2 (1%)                                 | .120               |                                         |  |                                         |  |
| Hyperintense, no rim           | 158 (52%)                                       | 143 (54%) | 15 (35%)                                 | .018 <sup>b</sup>  | 111 (52%)                                   | 47 (51%) | .900                                     | 86 (51%)  | 72 (52%)                               | .958               |                                         |  |                                         |  |
| Hyperintense, hyperintense rim | 13 (4%)                                         | 11 (4%)   | 2 (5%)                                   | .888               | 9 (4%)                                      | 4 (4%)   | .955                                     | 4 (2%)    | 9 (6%)                                 | .078               |                                         |  |                                         |  |
| Hyperintense, hypointense rim  | 5 (2%)                                          | 3 (1%)    | 2 (5%)                                   | .092               | 2 (1%)                                      | 3 (3%)   | .141                                     | 3 (2%)    | 2 (1%)                                 | .806               |                                         |  |                                         |  |
| Any core, hypointense rim      | 7 (2%)                                          | 4 (2%)    | 3 (7%)                                   | .027 <sup>b</sup>  | 3 (1%)                                      | 4 (4%)   | .114                                     | 3 (2%)    | 4 (3%)                                 | .529               |                                         |  |                                         |  |
| Any core, hyperintense rim     | 18 (6%)                                         | 11 (4%)   | 7 (16%)                                  | .002 <sup>b</sup>  | 9 (4%)                                      | 9 (10%)  | .057                                     | 5 (3%)    | 13 (9%)                                | .019 <sup>b</sup>  |                                         |  |                                         |  |
| QSM with any rim               | 25 (9%)                                         | 15 (6%)   | 10 (23%)                                 | <.001 <sup>b</sup> | 12 (6%)                                     | 13 (14%) | .012 <sup>b</sup>                        | 8 (5%)    | 17 (12%)                               | .013 <sup>b</sup>  |                                         |  |                                         |  |

**Note:**—n indicates number of lesions in each group.

<sup>a</sup> The appearance of lesion and lesion rim (if present) is described. The P value represents statistical significance for the  $\chi^2$  test of proportions, which was tested for groups as a whole (not per subject).

<sup>b</sup> P < .05.

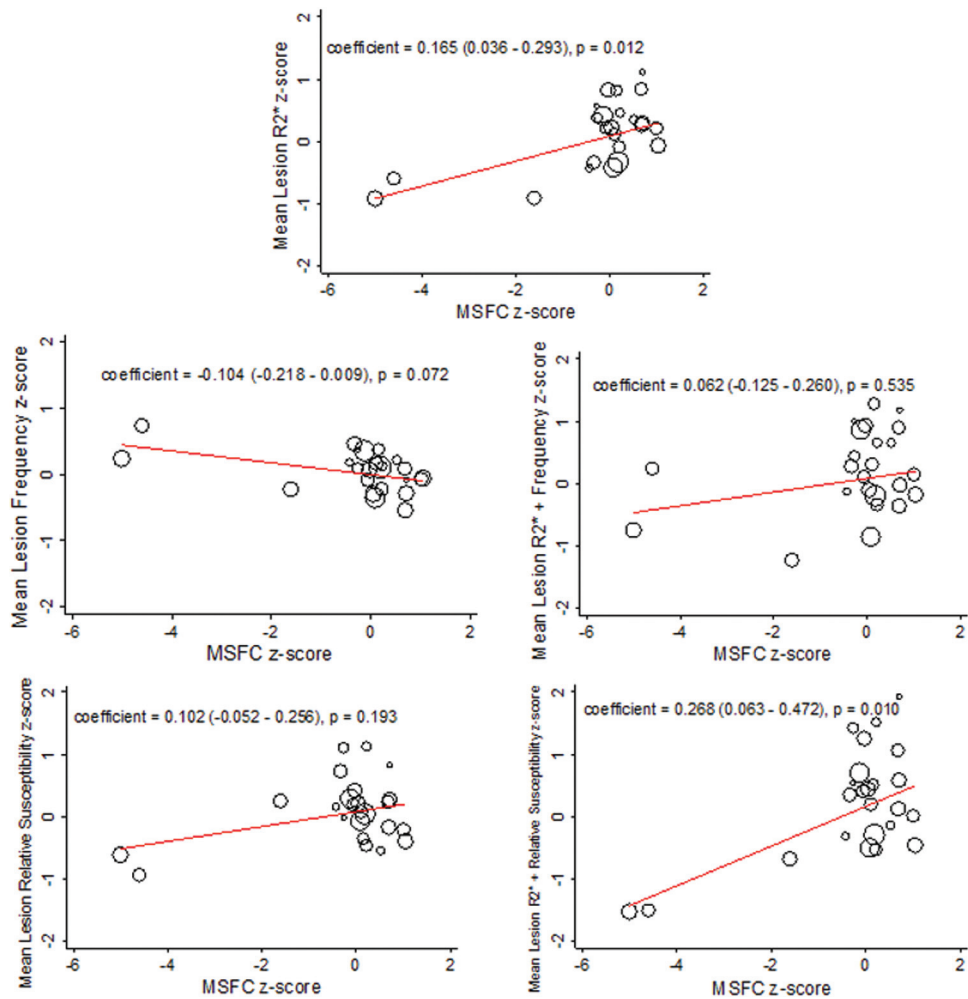

**ON-LINE FIG 1.** Relationship between MSFC and quantitative R2\*, frequency, and relative susceptibility values. Shown are the results of mixed-model regression (adjusted for age and sex) for prediction of the quantitative MRI index value by the Multiple Sclerosis Functional Composite z score as represented by a fitted-values plot. The *open circles* represent fitted values based on the fixed and random effects from the model, with each *circle* thus representing 1 subject and the size of the *circle* weighted for the number of lesions that particular subject contributed to the model. The regression coefficient for the fixed-effects portion of the model is shown in each panel, along with the *P* value for the significance of that coefficient. To place all quantitative values in an equivalent space, we converted all values to z-score units (based on the mean and SD from all lesions). A significant inverse relationship was found between R2\* and MSFC and for a combined index of R2\* + relative susceptibility and MSFC, though this relationship was heavily influenced by data from a small number of subjects with the worst MSFC scores.

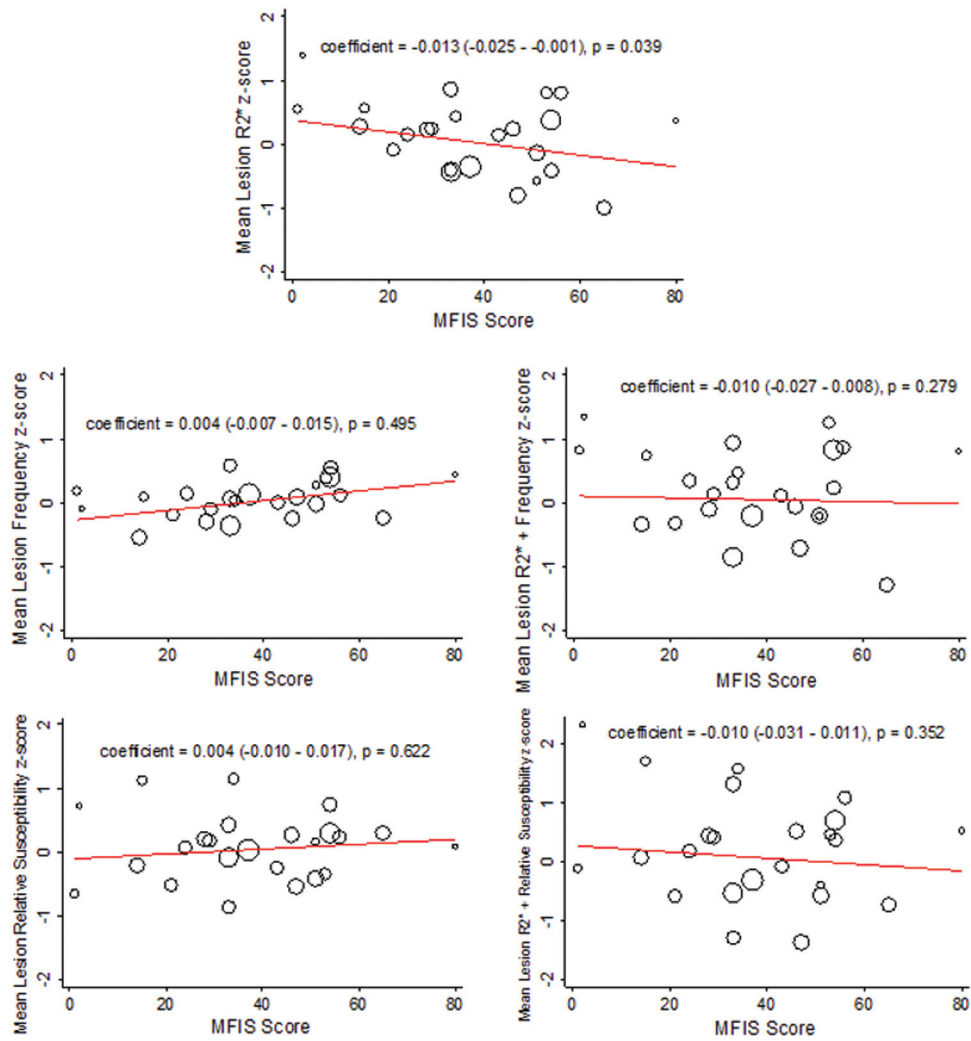

**ON-LINE FIG 2.** The relationship between fatigue and quantitative R2\*, frequency, and relative susceptibility values. Shown are the results of mixed-model regression (adjusted for age and sex) for the prediction of the quantitative MRI index value by the Modified Fatigue Impact Scale score as represented by a fitted-values plot (see Fig 4 and “Materials and Methods” for details). A significant inverse relationship was found between R2\* and MFIS.
